# Supplementary material
Source: publisher figshare collection journal article supplement (https://frontiersin.figshare.com/ndownloader/files/12109535)
Supplement: Supplementary file [file 12109535]

## Supplementary Material

### The effect of blindness on long-term episodic memory of odors and sounds

Stina Cornell Kärnekull<sup>1\*</sup>, Artin Arshamian<sup>1,2,3</sup>, Mats E Nilsson<sup>1</sup>, Maria Larsson<sup>1</sup>

\* Correspondence: Stina Cornell Kärnekull: stina.cornell.karnekull@psychology.su.se

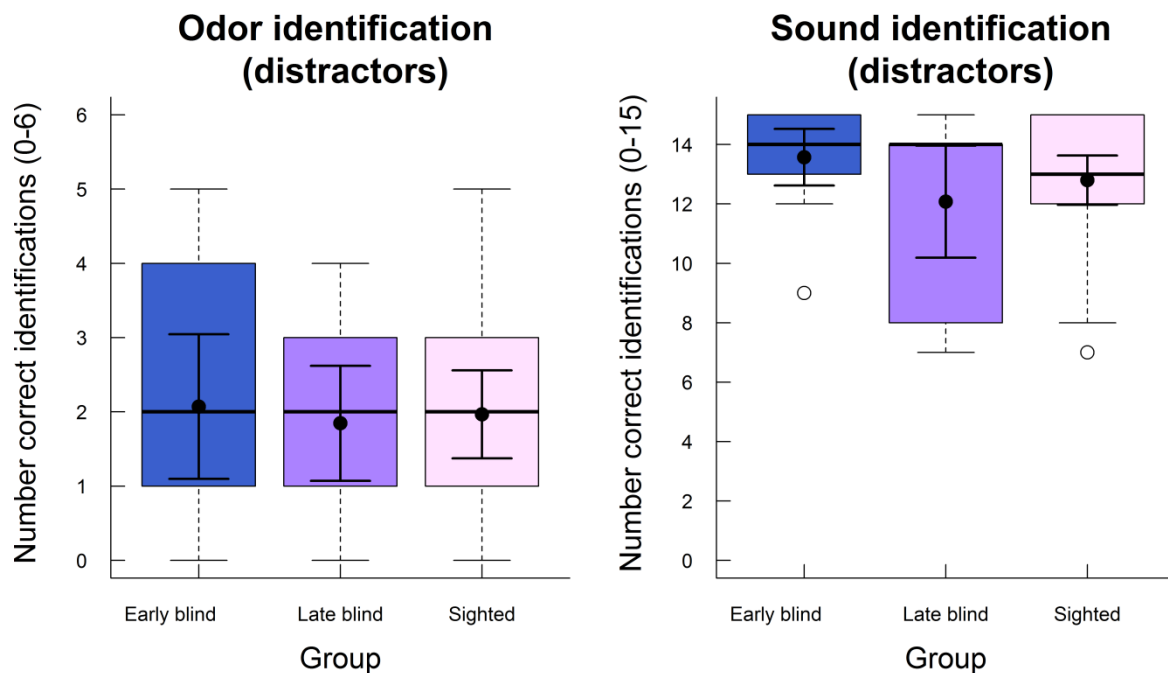

**Figure S5.** Boxplots of identification performance for high familiar distractor odors (left panel) and high familiar distractor sounds (right panel) at follow-up are displayed separately for early blind, late blind, and sighted participants. The boxes indicate the 25th, 50th (median), and 75th percentiles of the distribution (lower, middle, and upper horizontal lines of the box). The upper hinges indicate the maximum value of the variable located within a distance of 1.5 times the inter-quartile range above the 75th percentile. The lower hinges indicate the corresponding distance to the 25th percentile value. Circles indicate values outside these hinges (outliers). The means and 95 % confidence intervals (dots and error bars in solid lines) are superimposed on the boxplots.
